# Supplementary material for: Identification of Potential Blind-Side Hypermelanosis-Related lncRNA–miRNA–mRNA Regulatory Network in a Flatfish Species, Chinese Tongue Sole (Cynoglossus semilaevis)
Source: Front Genet. 2022 Feb 3;12:817117. doi: 10.3389/fgene.2021.817117 (PMC8850641; doi:10.3389/fgene.2021.817117)
Supplement: Supplementary file 9 [file Table12.xlsx]

## Sheet: Table S12
Supplementary Table 12 KEGG pathway enrichment analysis of DEGs involved in ceRNA network
#	Pathway	Candidate genes with pathway annotation	All genes with pathway annotation	Pvalue	Qvalue	Pathway ID	Genes
1	Nitrogen metabolism	3 (4.62%)	25 (0.29%)	0.000826	0.103295	ko00910	K01672;ncbi_103385053, CA; carbonic anhydrase [EC:4.2.1.1];K01915;ncbi_103389196,glnA, GLUL; glutamine synthetase [EC:6.3.1.2];K18246;ncbi_103382035,CA4; carbonic anhydrase 4 [EC:4.2.1.1]
2	Glycosphingolipid biosynthesis - globo and isoglobo series	2 (3.08%)	24 (0.28%)	0.013781	0.49926	ko00603	K00722;ncbi_103386423,GBGT1; globoside alpha-N-acetylgalactosaminyltransferase [EC:2.4.1.88];K03663;ncbi_103378711,FUT9; 4-galactosyl-N-acetylglucosaminide 3-alpha-L-fucosyltransferase [EC:2.4.1.152]
3	Cocaine addiction	3 (4.62%)	82 (0.95%)	0.023506	0.49926	ko05030	K04144;ncbi_103391466,DRD1; dopamine receptor D1;K09047;ncbi_103394221,CREB5, CREBPA; cyclic AMP-responsive element-binding protein 5;K15494;ncbi_103381481,PPP1R1B, DARPP32; protein phosphatase 1 regulatory subunit 1B
4	Folate biosynthesis	2 (3.08%)	34 (0.39%)	0.0267	0.49926	ko00790	K00500;ncbi_103382571,phhA, PAH; phenylalanine-4-hydroxylase [EC:1.14.16.1];K01495;ncbi_103378725,GCH1, folE; GTP cyclohydrolase IA [EC:3.5.4.16]
5	Glycosaminoglycan biosynthesis - chondroitin sulfate / dermatan sulfate	2 (3.08%)	38 (0.44%)	0.032825	0.49926	ko00532	K01020;ncbi_103387226,CHST3; chondroitin 6-sulfotransferase 3 [EC:2.8.2.17];K08106;ncbi_103386296,CHST15; N-acetylgalactosamine 4-sulfate 6-O-sulfotransferase [EC:2.8.2.33]
6	Mannose type O-glycan biosyntheis	2 (3.08%)	42 (0.49%)	0.039443	0.49926	ko00515	K03663;ncbi_103378711,FUT9; 4-galactosyl-N-acetylglucosaminide 3-alpha-L-fucosyltransferase [EC:2.4.1.152];K07968;ncbi_103377879,B4GALT3; beta-1,4-galactosyltransferase 3 [EC:2.4.1.90 2.4.1.38 2.4.1.-]
7	Basal cell carcinoma	3 (4.62%)	101 (1.17%)	0.040034	0.49926	ko05217	K00572;ncbi_103382897,WNT7; wingless-type MMTV integration site family, member 7;K02085;ncbi_103398463,APC; adenomatosis polyposis coli protein;K06231;ncbi_103383347,HHIP; hedgehog interacting protein
8	Glycosphingolipid biosynthesis - lacto and neolacto series	2 (3.08%)	43 (0.5%)	0.041171	0.49926	ko00601	K03663;ncbi_103378711,FUT9; 4-galactosyl-N-acetylglucosaminide 3-alpha-L-fucosyltransferase [EC:2.4.1.152];K07968;ncbi_103377879,B4GALT3; beta-1,4-galactosyltransferase 3 [EC:2.4.1.90 2.4.1.38 2.4.1.-]
Note
KEGG: Kyoto Encyclopedia of Genes and Genomes
DEG: differentially expressed gene
ceRNA: competing endogenous RNA
